# Supplementary material
Source: bioRxiv or medRxiv preprint supplement (https://www.biorxiv.org/highwire/filestream/69036/field_highwire_adjunct_files/9/216754-18.pdf)
Supplement: Supplementary file [file 216754-18.pdf]

Supplementary Table 9: Correlation results between OAS2 expression and PDL1, PDL2 expression

|          | PDL1              |                 | PDL2              |                 |
|----------|-------------------|-----------------|-------------------|-----------------|
|          | Correlation       | p-value         | Correlation       | p-value         |
| BLCA     | <b>0.37986076</b> | <b>1.33E-07</b> | <b>0.47881211</b> | <b>9.23E-12</b> |
| BRCA     | <b>0.50650067</b> | <b>2.64E-65</b> | <b>0.50711491</b> | <b>1.75E-65</b> |
| COADREAD | <b>0.60207578</b> | <b>2.25E-59</b> | <b>0.57225802</b> | <b>1.55E-52</b> |
| GBM      | <b>0.2443322</b>  | <b>3.03E-08</b> | <b>0.44456103</b> | <b>1.10E-25</b> |
| HNSC     | <b>0.46167336</b> | <b>5.53E-21</b> | <b>0.58763591</b> | <b>8.03E-36</b> |
| LAML     | <b>0.35092034</b> | <b>2.21E-06</b> | <b>0.47037297</b> | <b>6.58E-11</b> |
| LUAD     | <b>0.46354703</b> | <b>2.02E-27</b> | <b>0.50251799</b> | <b>1.19E-32</b> |
| LUSC     | <b>0.3021614</b>  | <b>8.38E-12</b> | <b>0.41479729</b> | <b>8.47E-22</b> |
| OV       | <b>0.48596421</b> | <b>2.07E-33</b> | <b>0.42196289</b> | <b>9.07E-25</b> |
| UCEC     | <b>0.46365178</b> | <b>1.93E-28</b> | <b>0.39655769</b> | <b>1.40E-20</b> |
